# Supplementary material for: Divergent copies of the large inverted repeat in the chloroplast genomes of ulvophycean green algae
Source: PubMed Central journal article supplement (PMC5430533; doi:10.1038/s41598-017-01144-1), 2017-04-20
Supplement: 41598_2017_1144_MOESM1_ESM.pdf [file 41598_2017_1144_MOESM1_ESM.pdf]

**Divergent copies of the large inverted repeat in the chloroplast  
genomes of ulvophycean green algae**

**(Supplementary Information)**

Monique Turmel, Christian Otis, and Claude Lemieux\*

Institut de Biologie Intégrative et des Systèmes, Département de biochimie,  
de microbiologie et de bio-informatique, Université Laval, Québec (QC)

Canada

\* Corresponding author

E-mail: [claude.lemieux@bcm.ulaval.ca](mailto:claude.lemieux@bcm.ulaval.ca)

| Taxon                             | Technology | Sequencing reads (no.) |         | Fold coverage of chloroplast genome sequences |        |        |        |        |        |        |
|-----------------------------------|------------|------------------------|---------|-----------------------------------------------|--------|--------|--------|--------|--------|--------|
|                                   |            | Total                  | cpDNA   | Average                                       | IR-SC1 | IR-SC2 | IR-SC3 | IR-SC4 | IR-SC5 | IR-SC6 |
| <i>Ignatius tetrasporus</i>       | Roche 454  | 49,055                 | 41,372  | 60                                            | 43     | 32     | 44     | 32     | -      | -      |
| <i>Pseudocharacium americanum</i> | Roche 454  | 40,038                 | 37,504  | 58                                            | 45     | 58     | 43     | 32     | -      | -      |
| <i>Dangermannia microcystis</i>   | Roche 454  | 80,710                 | 48,067  | 108                                           | 117    | 75     | 36     | 48     | -      | -      |
| <i>Pseudoneochloris marina</i>    | Roche 454  | 82,351                 | 59,134  | 156                                           | 161    | 149    | 152    | 113    | -      | -      |
| <i>Chamaetrichon capsulatum</i>   | Illumina   | 1,997,570              | 96,903  | 154                                           | 125    | 105    | 119    | 93     | 173    | 123    |
| <i>Trichosarcina mucosa</i>       | Illumina   | 4,067,674              | 275,477 | 361                                           | 320    | 218    | 167    | 323    | -      | -      |

**Supplementary Table S1. Summary statistics of the chloroplast genome sequencing and assemblies.** The sequence coverage values observed at the junctions between IR and single-copy regions (IR-SC1 to IR-SC6) are provided in the order these junctions appear in the GenBank accessions of the chloroplast genomes.

| Taxon                           | ORF <sup>a</sup> | Coordinates <sup>b</sup> | Conserved domain or similar protein                                                              |
|---------------------------------|------------------|--------------------------|--------------------------------------------------------------------------------------------------|
| <i>Ignatius tetrasporus</i>     | 437              | 22433-21120              | HNH endonuclease (pfam01844) with RRXRR domain (pfam14239)                                       |
|                                 | 112              | 46900-46562              | HNH endonuclease with RRXRR domain (pfam14239)                                                   |
|                                 | 100              | 158515-158213            | HNH endonuclease                                                                                 |
|                                 | 128              | 158980-158594            | HNH endonuclease (pfam01844)                                                                     |
|                                 | 106              | 159328-159008            | HNH endonuclease with RRXRR domain (pfam14239)                                                   |
|                                 | 98               | 220328-220624            | Transposase                                                                                      |
| <i>Dangermannia microcystis</i> | 246              | 123637-122897            | Group II intron maturase (pfam08388) and HNH (pfam01844) domains                                 |
|                                 | 114              | 124647-124303            | N-terminal domain of reverse transcriptase (pfam13655)                                           |
| <i>Chamaetrichon capsulatum</i> | 680              | 84264-86306              | Hypothetical protein MVEG-06986 of <i>Mortierella verticillata</i>                               |
|                                 | 206              | 121843-121223            | Hypothetical protein PsakCp041 of <i>Pseudendozonium akinetum</i> (orf239)                       |
| <i>Trichosarcina mucosa</i>     | 190              | 67813-68064              | DNA breaking-rejoining enzyme, phage integrase family (pfam00589)                                |
|                                 | 121              | 86662-87027              | Hypothetical protein PsakCp022 of <i>Pseudendozonium akinetum</i> (orf156)                       |
|                                 | 233              | 154383-155084            | DNA breaking-rejoining enzyme, phage integrase family (pfam00589)                                |
|                                 | 178              | 155855-155319            | Hypothetical chloroplast-encoded protein of <i>Prasiola crispa</i> and <i>Mankyua chejuensis</i> |

**Supplementary Table S2. Non-canonical genes identified as freestanding ORFs in the ulvophycean chloroplast genomes examined in this study.** <sup>a</sup>Reported here are the freestanding ORFs larger than 100 codons that revealed similarity (*E*-value threshold of 1e-06) with proteins of known functions and/or recognized protein domains in BlastP searches. Each ORF is identified by the number of amino acid residues in the encoded protein. <sup>b</sup>Genomic coordinates of the ORFs in the GenBank accessions.

| Number                         | Sequence                | Strand | Genomic position (3' end) |
|--------------------------------|-------------------------|--------|---------------------------|
| <i>Ignatius tetrasporus</i>    |                         |        |                           |
| 1                              | GATGTATCAACGTCAAATCACG  | +      | 183754                    |
| 2                              | GATCTAGGGCTTGCTTTGCATTC | -      | 186657                    |
| 3                              | TTAAAGCGATTGAGCGAAGCAG  | +      | 188149                    |
| 4                              | TAGAGGTATCCGATTTGCTCAG  | -      | 192460                    |
| 5                              | GTGACTTTAACCATGCGATGAG  | -      | 451                       |
| 6                              | AAGGAGTGTTGCGACTACAAAC  | +      | 237146                    |
| 7                              | TGCAAATAGTACTCAAAGCGTC  | -      | 235837                    |
| 8                              | TAAAGCTGATGGAAGACGTTTC  | +      | 231801                    |
| <i>Pseudoneochloris marina</i> |                         |        |                           |
| 1                              | CAACCTACACAATCTTCCGTAC  | -      | 103470                    |
| 2                              | CTCGAAAGCTTGAACGTTGAAC  | +      | 95139                     |
| 3                              | GTAGCACCAGCTATTCAACCTC  | +      | 128692                    |
| 4                              | GAGTCGCACGAAAACAAGAGTC  | -      | 419                       |
| 5                              | AACAGGTTACTGCCTAAGGACG  | +      | 129287                    |
| 5                              | AACAGGTTACTGCCTAAGGACG  | -      | 102782                    |
| 6                              | GATGCTTTCAGCGATTATCCAC  | +      | 95917                     |
| 6                              | GATGCTTTCAGCGATTATCCAC  | -      | 134412                    |

**Supplementary Table S3. Sequences of the PCR primers used to investigate flip-flop recombination in the *Ignatius* and *Pseudoneochloris* chloroplast genomes.**

| Taxon                                  | Collection   | GenBank accession(s) |
|----------------------------------------|--------------|----------------------|
| <b>Streptophytes</b>                   |              |                      |
| <i>Mesostigma viride</i>               | NIES 296     | NC 002186            |
| <i>Chlorokybus atmophyticus</i>        | SAG 48.80    | NC 008822            |
| <b>Prasinophytes</b>                   |              |                      |
| <i>Prasinococcus</i> sp. CCMP 1194     | CCMP 1194    | KJ746597             |
| <i>Prasinophyceae</i> sp. MBIC 10622   | NBRC 102842  | KJ746602             |
| <i>Prasinoderma coloniale</i>          | CCMP 1220    | NC 024817            |
| <i>Pyramimonas parkeae</i>             | CCMP 726     | FJ493499             |
| <i>Monomastix</i> sp. OKE-1            | PC O'Kelly   | NC 012101            |
| <i>Ostreococcus tauri</i>              | OTTH0595     | NC 008289            |
| <i>Micromonas commoda</i>              | RCC 299      | NC 012575            |
| <i>Pycnococcus provasolii</i>          | CCMP 1203    | NC 012097            |
| <i>Nephroselmis olivacea</i>           | NIES 484     | NC 000927            |
| <i>Nephroselmis astigmatica</i>        | NIES 252     | NC 024829            |
| <i>Picocystis salinarum</i>            | CCMP 1897    | NC 024828            |
| <i>Prasinophyceae</i> sp. CCMP 1205    | CCMP 1205    | KJ746601             |
| <b>Chlorodendrophyceae</b>             |              |                      |
| <i>Scherffellia dubia</i>              | SAG 17.86    | NC 029807            |
| <i>Tetraselmis</i> sp. CCMP 881        | CCMP 881     | KU167097             |
| <b>Pedinophyceae</b>                   |              |                      |
| <i>Marsupiomonas</i> sp. NIES 1824     | NIES 1824    | KM462870             |
| <i>Pedinomonas tuberculata</i>         | SAG 42.84    | NC 025530            |
| <i>Pedinomonas minor</i>               | UTEX LB 1350 | NC 016733            |
| <b>Chlorellales</b>                    |              |                      |
| <i>Parachlorella kessleri</i>          | SAG 211-11g  | NC 012978            |
| <i>Dicloster acuatus</i>               | SAG 41.98    | NC 025546            |
| <i>Marvania geminata</i>               | SAG 12.88    | NC 025549            |
| <i>Pseudochloris wilhelmii</i>         | SAG 1.80     | NC 025547            |
| <i>Chlorella vulgaris</i>              |              | NC 001865            |
| <i>Chlorella variabilis</i>            | NC 64A       | NC 015359            |
| <b>Core Trebouxiophyceae</b>           |              |                      |
| <i>Oocystis solitaria</i>              | SAG 83.80    | FJ968739             |
| <i>Planctonema lauterbornii</i>        | SAG 68.94    | NC 025541            |
| <i>Koliella corcontica</i>             | SAG 24.84    | NC 025536            |
| <i>Geminella terricola</i>             | SAG 20.91    | NC 025542            |
| <i>Geminella minor</i>                 | SAG 22.88    | NC 025544            |
| <i>Gloeotilopsis sterilis</i>          | UTEX 1704    | NC 025538            |
| <i>Pleurostrosarcina brevispinosa</i>  | UTEX 1176    | KM462875             |
| <i>Parietochloris pseudoalveolaris</i> | UTEX 975     | NC 025532            |
| <i>Neocystis brevis</i>                | CAUP D802    | NC 025535            |
| <i>Stichococcus bacillaris</i>         | UTEX 176     | NC 025527            |
| <i>Prasiolopsis</i> sp. SAG 84.81      | SAG 84.81    | KM462862             |
| <i>Chlorella mirabilis</i>             | SAG 38.88    | NC 025528            |
| <i>Koliella longiseta</i>              | UTEX 339     | NC 025531            |
| <i>Pabia signiensis</i>                | SAG 7.90     | NC 025529            |
| <i>Leptospira terrestris</i>           | UTEX 333     | NC 009681            |
| <i>Xylochloris irregularis</i>         | CAUP H7801   | NC 025534            |
| <i>Trebouxia aggregata</i>             | SAG 219-1D   | EU123962-EU124002    |
| <i>Myrmecia israelensis</i>            | UTEX 1181    | NC 025525            |
| <i>Characium perforatum</i>            | SAG 28.85    | NC 025543            |
| <i>Microthamnion kuetzingianum</i>     | UTEX 318     | NC 025537            |
| <i>Lobosphaera incisa</i>              | SAG 2007     | NC 025533            |
| <i>Watanabea reniformis</i>            | SAG 211-9b   | NC 025526            |
| <i>Dictyochloropsis reticulata</i>     | SAG 2150     | NC 025524            |
| <i>Choricystis minor</i>               | SAG 17.98    | NC 025539            |
| <i>Botryococcus braunii</i>            | SAG 807-1    | NC 025545            |
| <i>Elliptochloris bilobata</i>         | CAUP H7103   | NC 025548            |
| <i>Trebouxiophyceae</i> sp. MX-AZ01    | MX-AZ01      | NC 018569            |

|                                      |              |                     |
|--------------------------------------|--------------|---------------------|
| <i>Coccomyxa subellipsoidea</i>      | NIES 2166    | NC 015084           |
| <i>Paradoxia multiseta</i>           | SAG 18.84    | NC 025540           |
| <b>Bryopsidales</b>                  |              |                     |
| <i>Tydemania expeditionis</i>        | FL1151       | NC 026796           |
| <i>Bryopsis plumosa</i>              | West4718     | NC 026795           |
| <i>Bryopsis hypnoides</i>            |              | NC 013359           |
| <b>Ignatiales</b>                    |              |                     |
| <i>Pseudocharacium americanum</i>    | UTEX 2112    | KY407658            |
| <i>Ignatius tetrasporus</i>          | UTEX 2012    | KY407659            |
| <b>Oltmannsiellopsidales</b>         |              |                     |
| <i>Dangemannia microcystis</i>       | SAG 2022     | KY407660            |
| <i>Oltmannsiellopsis viridis</i>     | NIES 360     | NC 008099           |
| <b>Ulvales</b>                       |              |                     |
| <i>Pseudoneochloris marina</i>       | UTEX 1445    | KY407657            |
| <i>Ulva fasciata</i>                 |              | NC 029040           |
| <i>Ulva</i> sp. UNA                  | UNA00071828  | KP720616            |
| <b>Ulotrichales</b>                  |              |                     |
| <i>Chamaetrichon capsulatum</i>      | UTEX 1918    | KY407661            |
| <i>Pseudoclonium akinetum</i>        | UTEX 1912    | NC 008114           |
| <i>Trichosarcina mucosa</i>          | SAG 4.90     | KY407656            |
| <i>Gloeotilopsis planctonica</i>     | SAG 29.93    | KX306824            |
| <i>Gloeotilopsis sarcinoidea</i>     | UTEX 1710    | KX306821            |
| <b>Chlorophyceae</b>                 |              |                     |
| <i>Floydiella terrestris</i>         | UTEX 1709    | NC 014346           |
| <i>Oedogonium cardiacum</i>          | SAG 575-1b   | NC 011031           |
| <i>Stigeoclonium helveticum</i>      | UTEX 441     | NC 008372           |
| <i>Schizomeris leibleinii</i>        | UTEX LB 1228 | NC 015645           |
| <i>Treubaria triappendiculata</i>    | SAG 38.83    | NC 028578           |
| <i>Golenkinia longispicula</i>       | SAG 73.80    | KT625092 - KT625150 |
| <i>Jenufa minuta</i>                 | CAUP H8102   | NC 028582           |
| <i>Jenufa perforata</i>              | CAUP H 8101  | NC 028581           |
| <i>Bracteacoccus giganteus</i>       | UTEX 1251    | NC 028586           |
| <i>Mychonastes jurisii</i>           | SAG 37.98    | NC 028579           |
| <i>Acutodesmus obliquus</i>          | UTEX 393     | NC 008101           |
| <i>Hafniomonas laevis</i>            | NIES 257     | NC 028583           |
| <i>Carteria cerasiformis</i>         | NIES 425     | NC 028585           |
| <i>Carteria crucifera</i>            | UTEX 432     | KT624870 - KT624932 |
| <i>Carteria</i> sp. SAG 8-5          | SAG 8-5      | KT625419            |
| <i>Chloromonas typhlos</i>           | UTEX LB 1969 | KT624630 - KT624716 |
| <i>Chloromonas radiata</i>           | UTEX 966     | KT625008 - KT625084 |
| <i>Oogamochlamys gigantea</i>        | SAG 44.91    | NC 028580           |
| <i>Lobochlamys segnis</i>            | SAG 9.83     | KT624806 - KT624869 |
| <i>Lobochlamys culleus</i>           | SAG 19.72    | KT625151 - KT625204 |
| <i>Chlamydomonas asymmetrica</i>     | SAG 70.72    | KT624933 - KT625007 |
| <i>Volvox carteri</i> f. nagariensis | UTEX 2908    | GU084820            |
| <i>Chlamydomonas reinhardtii</i>     |              | NC 005353           |
| <i>Phacotus lenticularis</i>         | SAG 61-1     | NC 028587           |
| <i>Microglena monadina</i>           | SAG 31.72    | KT624717 - KT624805 |
| <i>Chlamydomonas moewusii</i>        | UTEX 97      | EF587443-EF587503   |
| <i>Characiochloris acuminata</i>     | SAG 31.95    | NC 028584           |
| <i>Dunaliella salina</i>             | CCAP 19/18   | NC 016732           |
| <i>Chlamydomonas applanata</i>       | SAG 11-9     | KT625417            |
| <i>Stephanosphaera pluvialis</i>     | SAG 78-1a    | KT625299 - KT625409 |
| <i>Chloromonas perforata</i>         | SAG 11-43    | KT625416            |
| <i>Haematococcus lacustris</i>       | SAG 34-1b    | KT625205 - KT625298 |
| <i>Chlorogonium capillatum</i>       | UTEX 11      | KT625085 - KT625091 |

**Supplementary Table S4. GenBank accession codes of the chloroplast genome sequences used to infer phylogenomic trees.**

**Supplementary Figure S1. Gene map of the *Ignatius tetrasporus* chloroplast**

**genome.** Filled boxes represent genes, with colors denoting gene categories as indicated in the legend. Genes on the outside are transcribed counterclockwise; those on the inside are transcribed clockwise.

**Supplementary Figure S2. Gene map of the *Pseudocharacium americanum***

**chloroplast genome.** Filled boxes represent genes, with colors denoting gene categories as indicated in the legend. Genes on the outside are transcribed counterclockwise; those on the inside are transcribed clockwise.

**Supplementary Figure S3. Gene map of the *Dangemannia microcystis* chloroplast**

**genome.** Filled boxes represent genes, with colors denoting gene categories as indicated in the legend. Genes on the outside are transcribed counterclockwise; those on the inside are transcribed clockwise.

**Supplementary Figure S4. Gene map of the *Pseudoneochloris marina* chloroplast**

**genome.** Filled boxes represent genes, with colors denoting gene categories as indicated in the legend. Genes on the outside are transcribed counterclockwise; those on the inside are transcribed clockwise.

**Supplementary Figure S5. Gene map of the *Chamaetrichon capsulatum* chloroplast**

**genome.** Filled boxes represent genes, with colors denoting gene categories as indicated in the legend. Genes on the outside map are transcribed counterclockwise; those on the inside are transcribed clockwise.

**Supplementary Figure S6. Gene map of the *Trichosarcina mucosa* chloroplast**

**genome.** Filled boxes represent genes, with colors denoting gene categories as indicated in the legend. Genes on the outside are transcribed counterclockwise; those on the inside are transcribed clockwise.

**Supplementary Figure S7. Gene locations of the rapidly-evolving sites that were removed from the PCG-AA (1,303 sites) and PCG12RNA (4,492 sites) data sets by filtration with TIGER.**

**Supplementary Figure S8. Phylogenomic trees inferred from the PCG12RNA data set using RAxML.** Bootstrap support values are reported on the nodes. A black dot indicates that the corresponding branch received a value of 100%. The scale bar denotes the estimated number of substitutions per site.

**Supplementary Figure S9. Phylogenomic trees inferred from the PCG12RNA data set using PhyloBayes.** Posterior probability values are reported on the nodes. A black dot indicates that the corresponding branch received a value of 1.0. The scale bar denotes the estimated number of substitutions per site.

**Supplementary Figure S10. Phylogenomic trees inferred from the PCG-AA data set using RAxML.** Bootstrap support values are reported on the nodes. A black dot indicates that the corresponding branch received a value of 100%. The scale bar denotes the estimated number of substitutions per site.

**Supplementary Figure S11. Phylogenomic trees inferred from the PCG-AA data set using PhyloBayes.** Posterior probability values are reported on the nodes. A black dot

indicates that the corresponding branch received a value of 1.0. The scale bar denotes the estimated number of substitutions per site.

### **Supplementary Figure S12. Repertoires of canonical genes in the ulvophycean**

**chloroplast genomes compared in this study.** Only the genes missing in one or more genomes are indicated. The presence of genes and pseudogenes is denoted by blue and light blue boxes, respectively. Protein-coding genes that were lost only once are mapped on the cladogram. A total of 95 genes are shared by all compared genomes: *accD*, *atpA*, *B*, *E*, *F*, *H*, *I*, *ccsA*, *cemA*, *chlI*, *clpP*, *ftsH*, *infA*, *petA*, *B*, *D*, *G*, *L*, *psaA*, *B*, *C*, *I*, *J*, *M*, *psbA*, *B*, *C*, *D*, *E*, *F*, *H*, *I*, *J*, *K*, *L*, *M*, *N*, *T*, *Z*, *rbcL*, *rpl2*, *5*, *14*, *16*, *19*, *20*, *23*, *32*, *36*, *rpoA*, *C2*, *rps2*, *3*, *4*, *7*, *8*, *9*, *11*, *12*, *14*, *18*, *19*, *rrf*, *rrl*, *rrs*, *tufA*, *ycf1*, *3*, *4*, *12*, *trnA*(*ugc*), *C*(*gca*), *D*(*guc*), *E*(*uuc*), *F*(*gaa*), *G*(*gcc*), *G*(*ucc*), *H*(*gug*), *I*(*gau*), *K*(*uuu*), *L*(*uaa*), *L*(*uag*), *Me*(*cau*), *Mf*(*cau*), *N*(*guu*), *P*(*ugg*), *Q*(*uug*), *R*(*acg*), *R*(*ucu*), *S*(*gcu*), *S*(*uga*), *T*(*ugu*), *V*(*uac*), *W*(*cca*), *Y*(*gua*).

## **References**

- 1 Lemieux, C., Otis, C. & Turmel, M. Ancestral chloroplast genome in *Mesostigma viride* reveals an early branch of green plant evolution. *Nature* **403**, 649-652, doi:10.1038/35001059 (2000).
- 2 Turmel, M., Otis, C. & Lemieux, C. Mitochondrion-to-chloroplast DNA transfers and intragenomic proliferation of chloroplast group II introns in *Gloeotilopsis* green algae (Ulotrichales, Ulvophyceae). *Genome Biol Evol* **8**, 2789-2805, doi:10.1093/gbe/evw190 (2016).



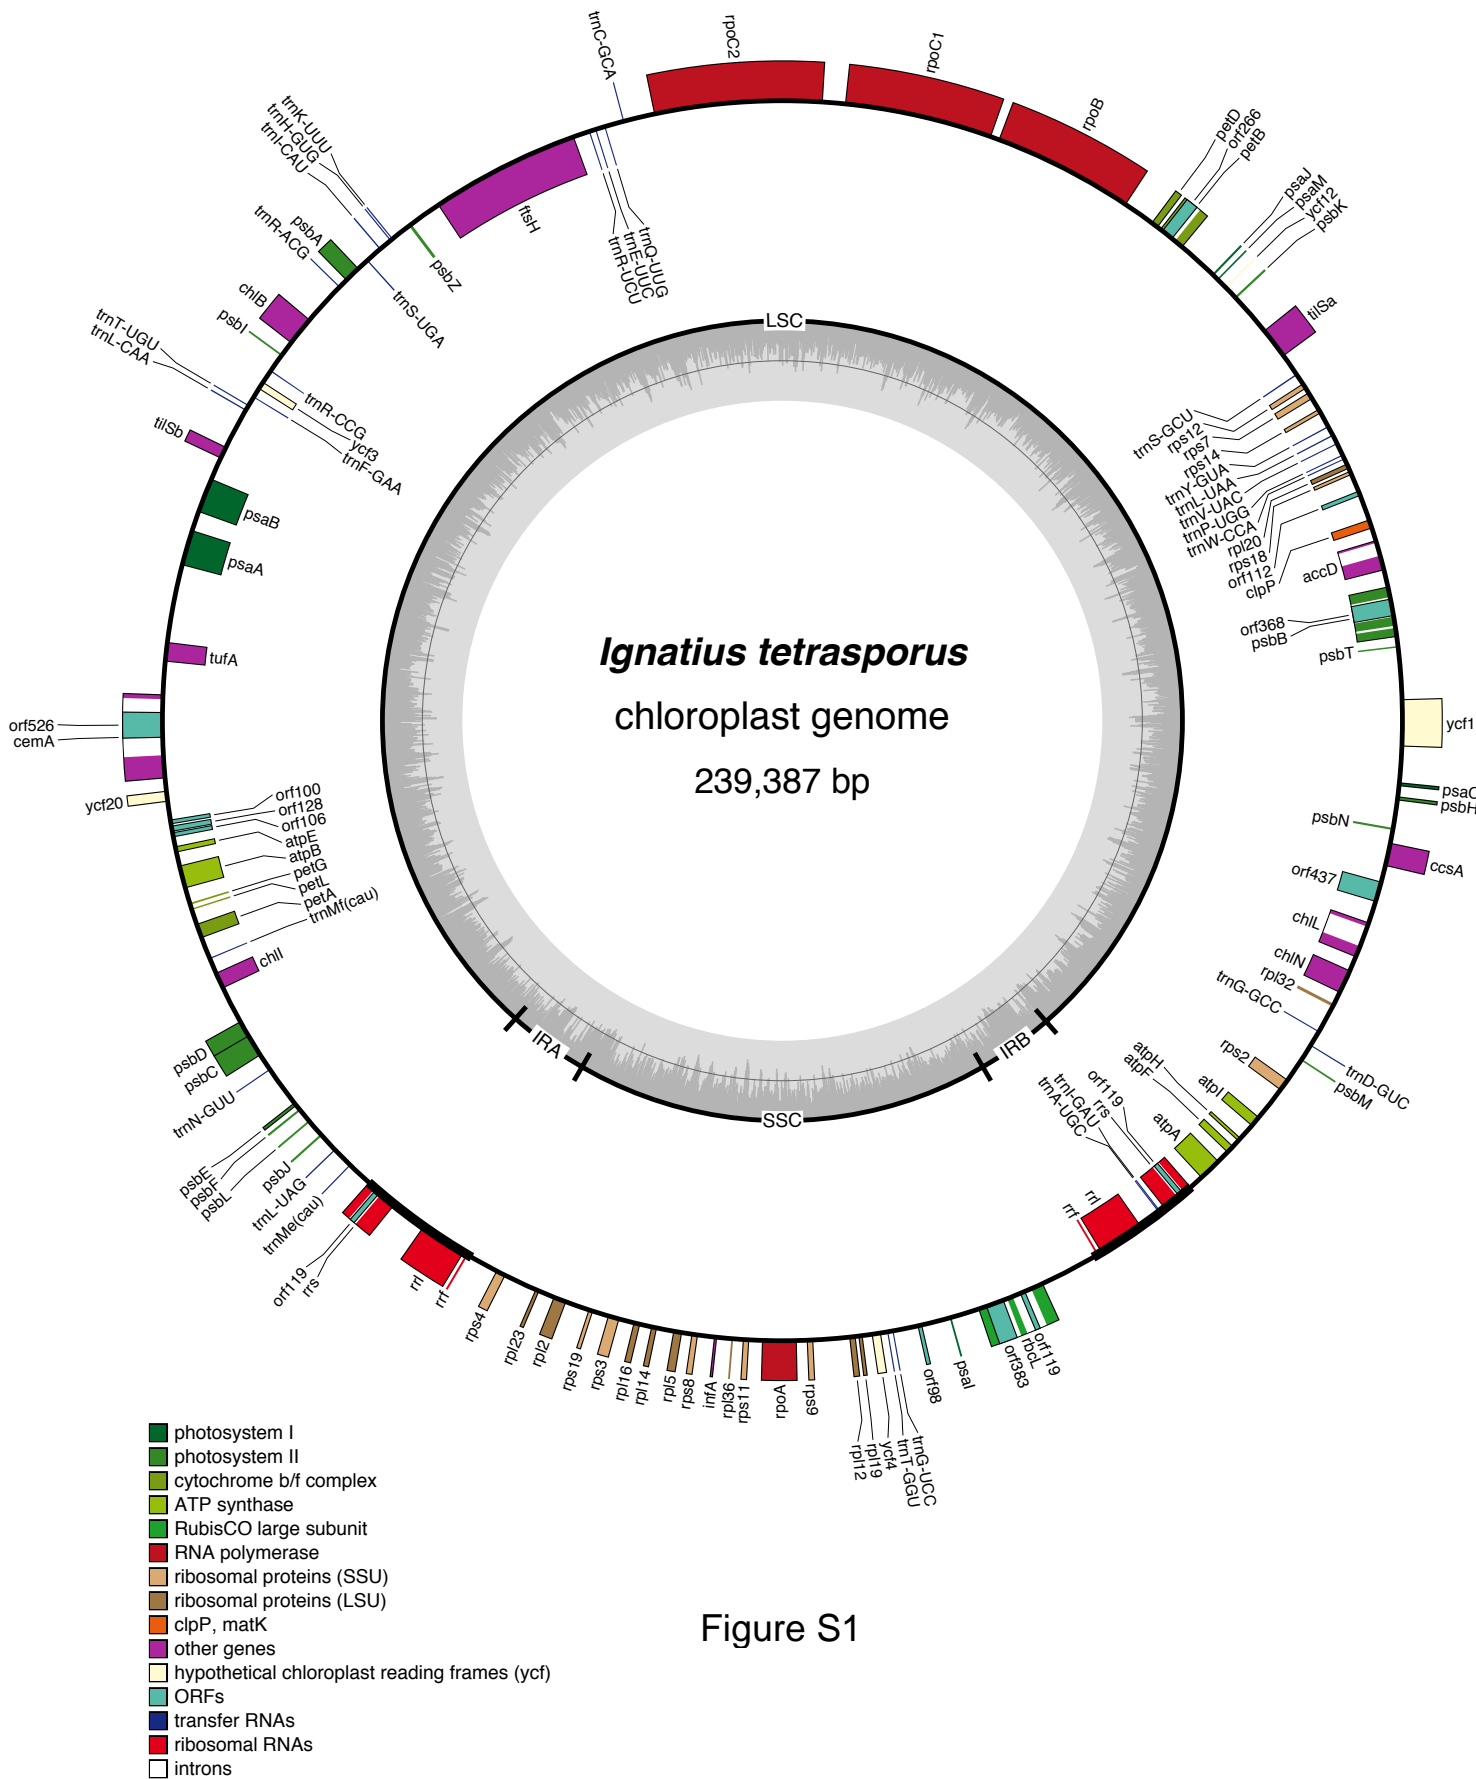

Figure S1







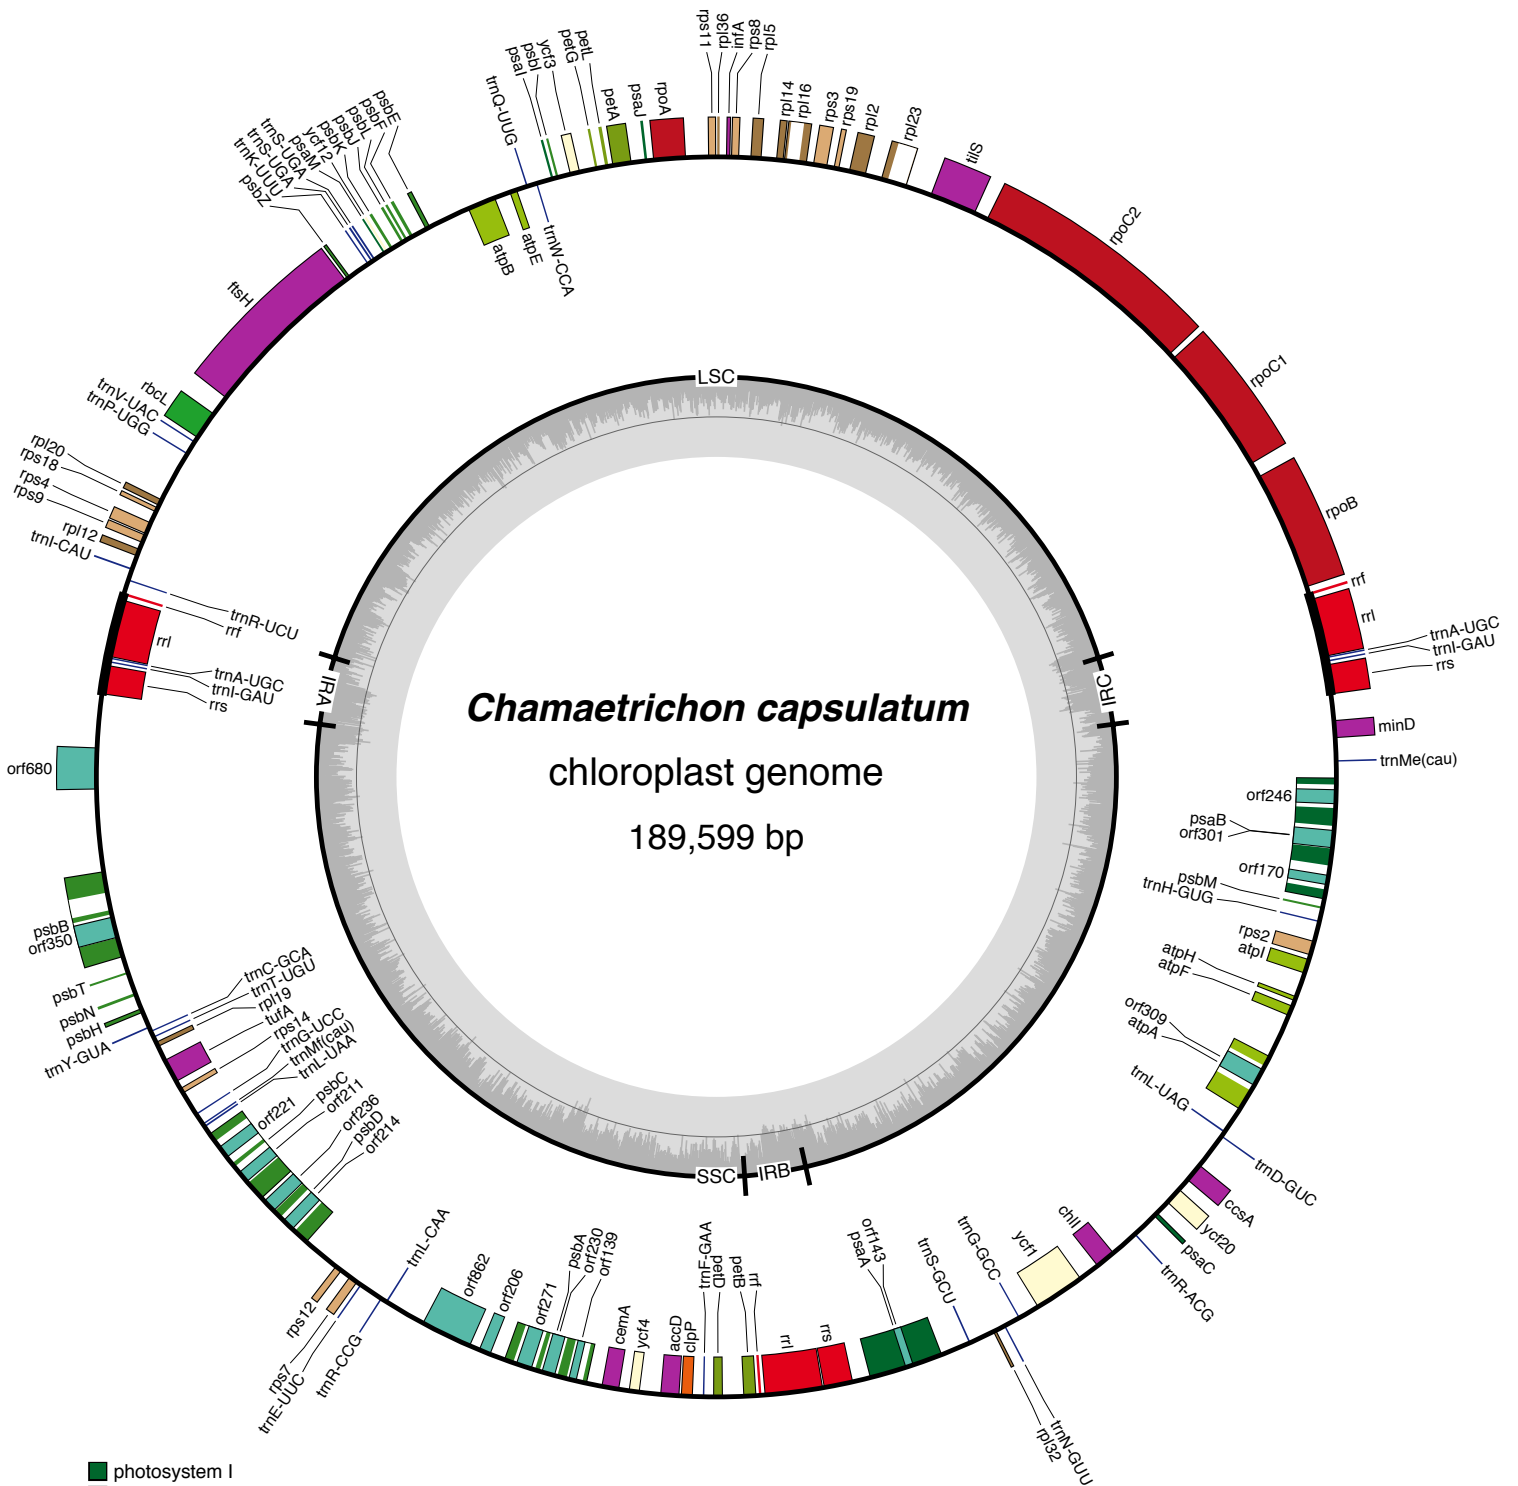

- photosystem I
- photosystem II
- cytochrome b/f complex
- ATP synthase
- RubisCO large subunit
- RNA polymerase
- ribosomal proteins (SSU)
- ribosomal proteins (LSU)
- clpP, matK
- other genes
- hypothetical chloroplast reading frames (ycf)
- ORFs
- transfer RNAs
- ribosomal RNAs
- introns

Figure S5



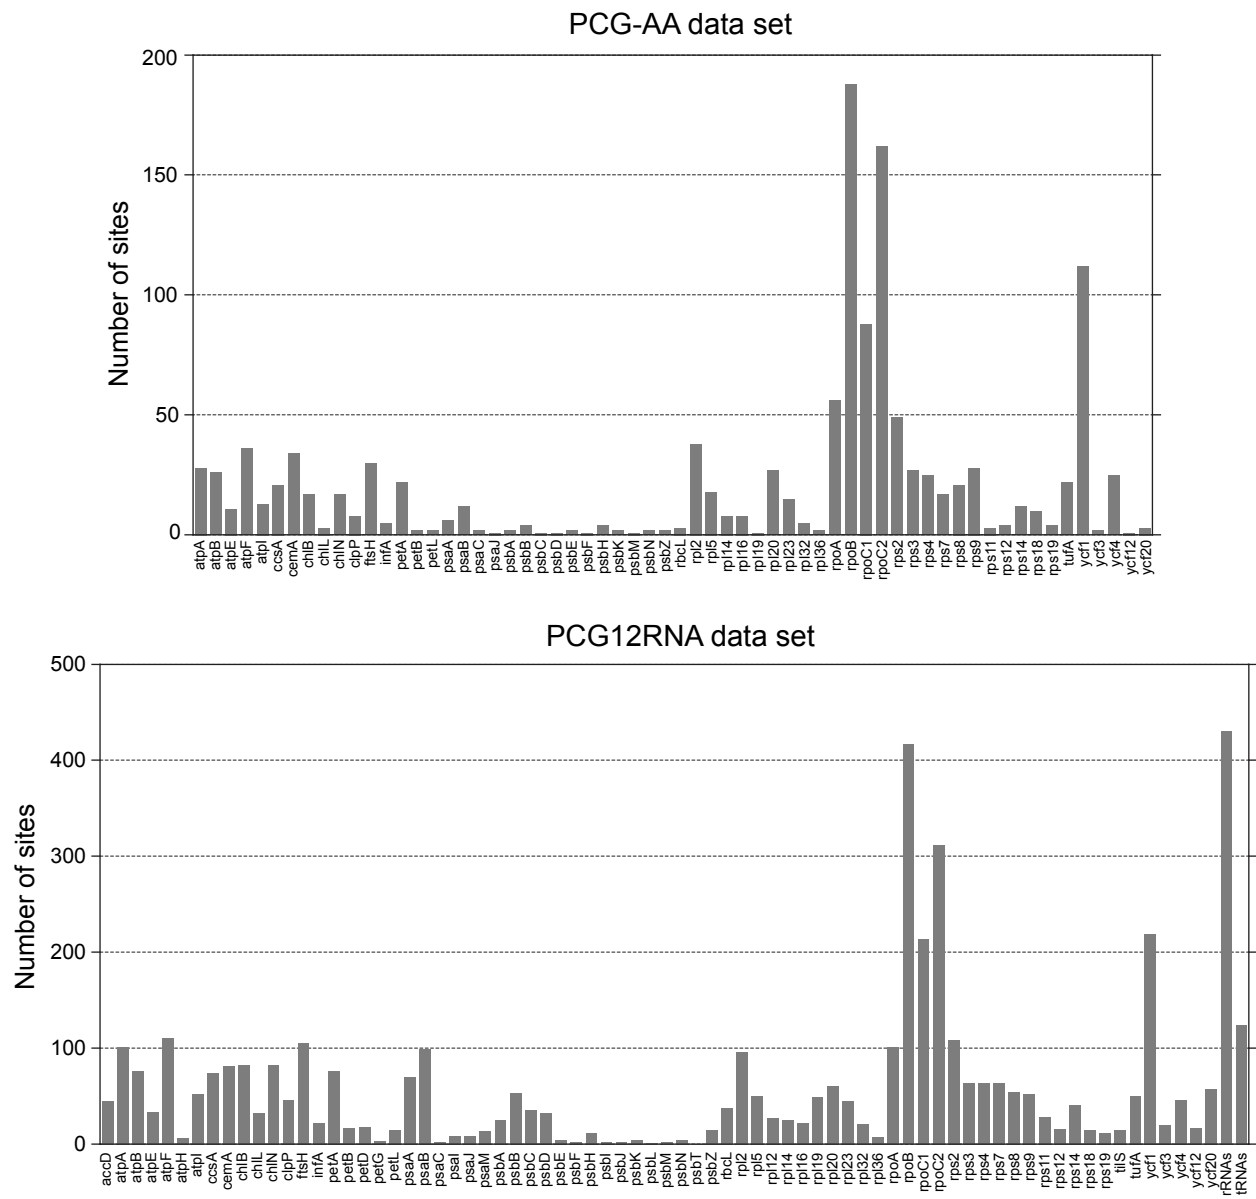

Figure S7

PCG12RNA  
RAXML GTR

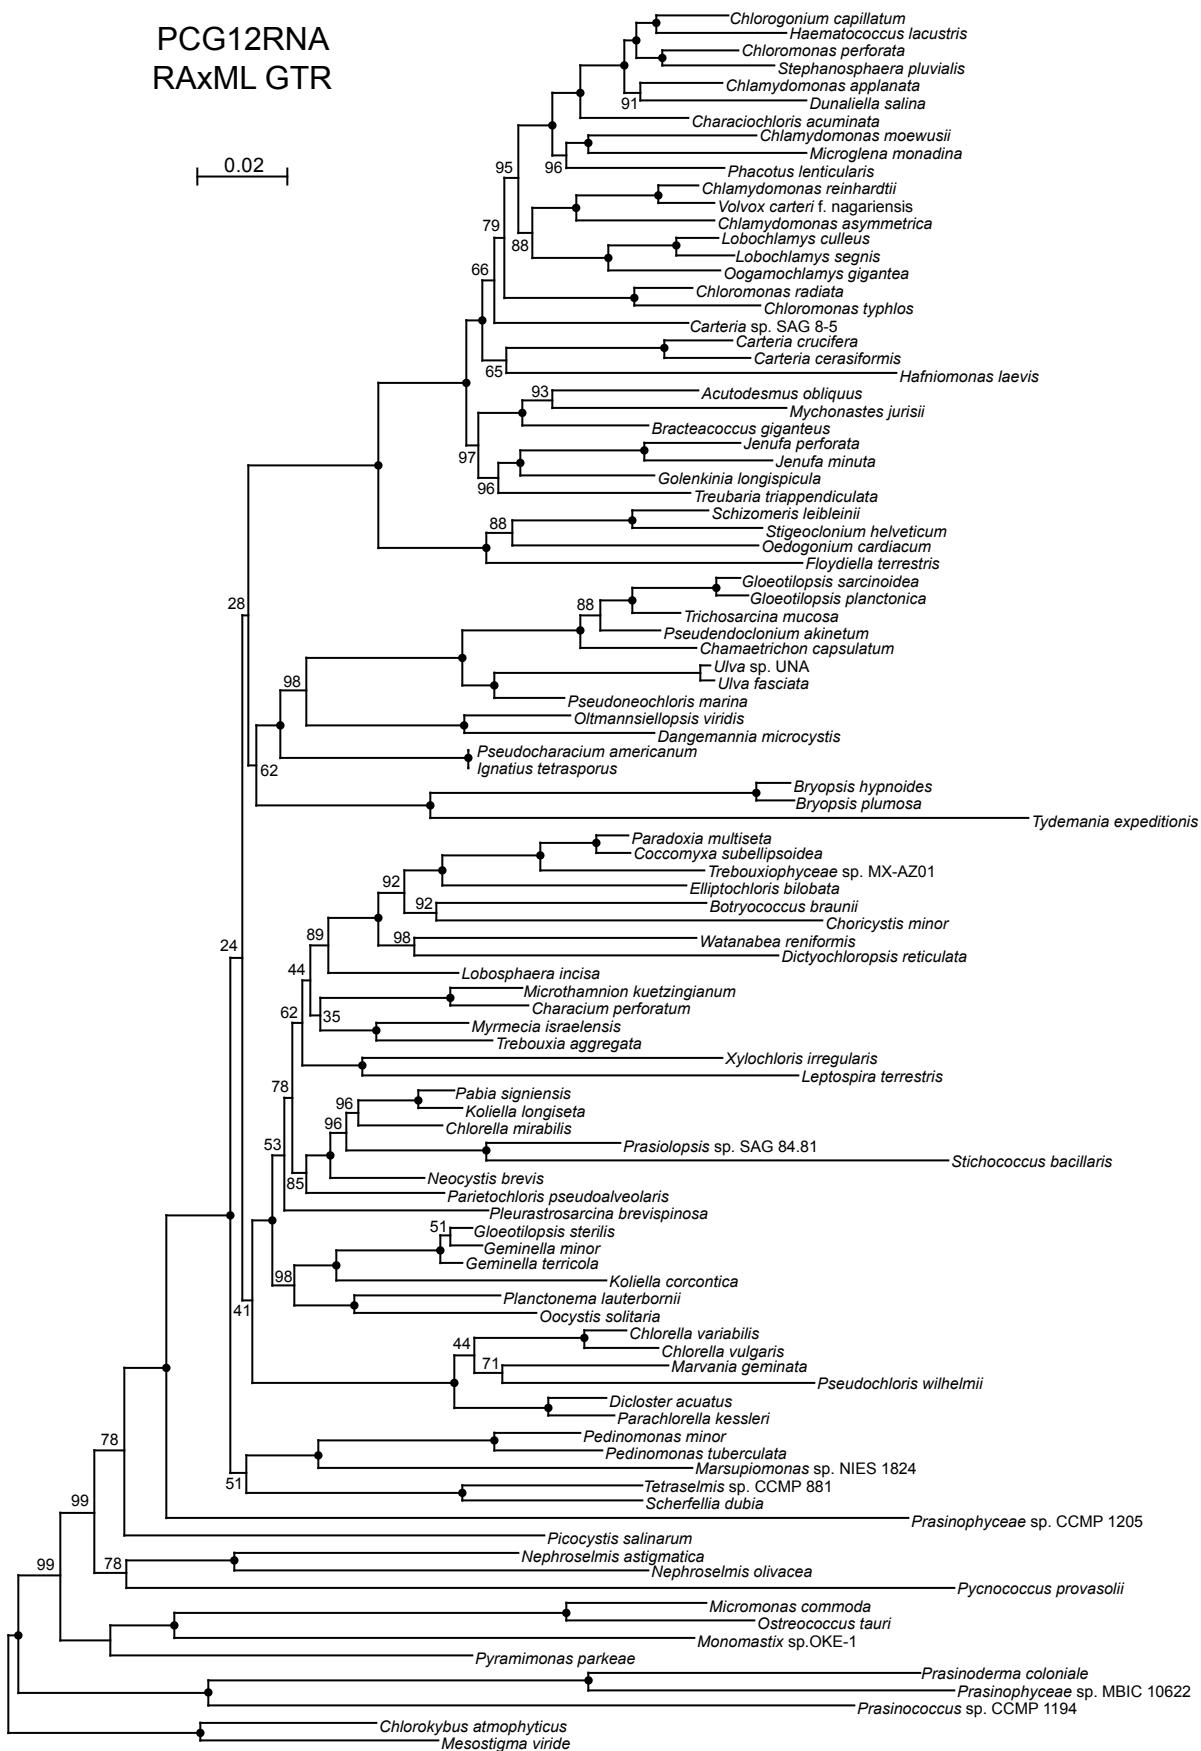

Figure S8





PCG-AA  
RAXML GTR

0.1

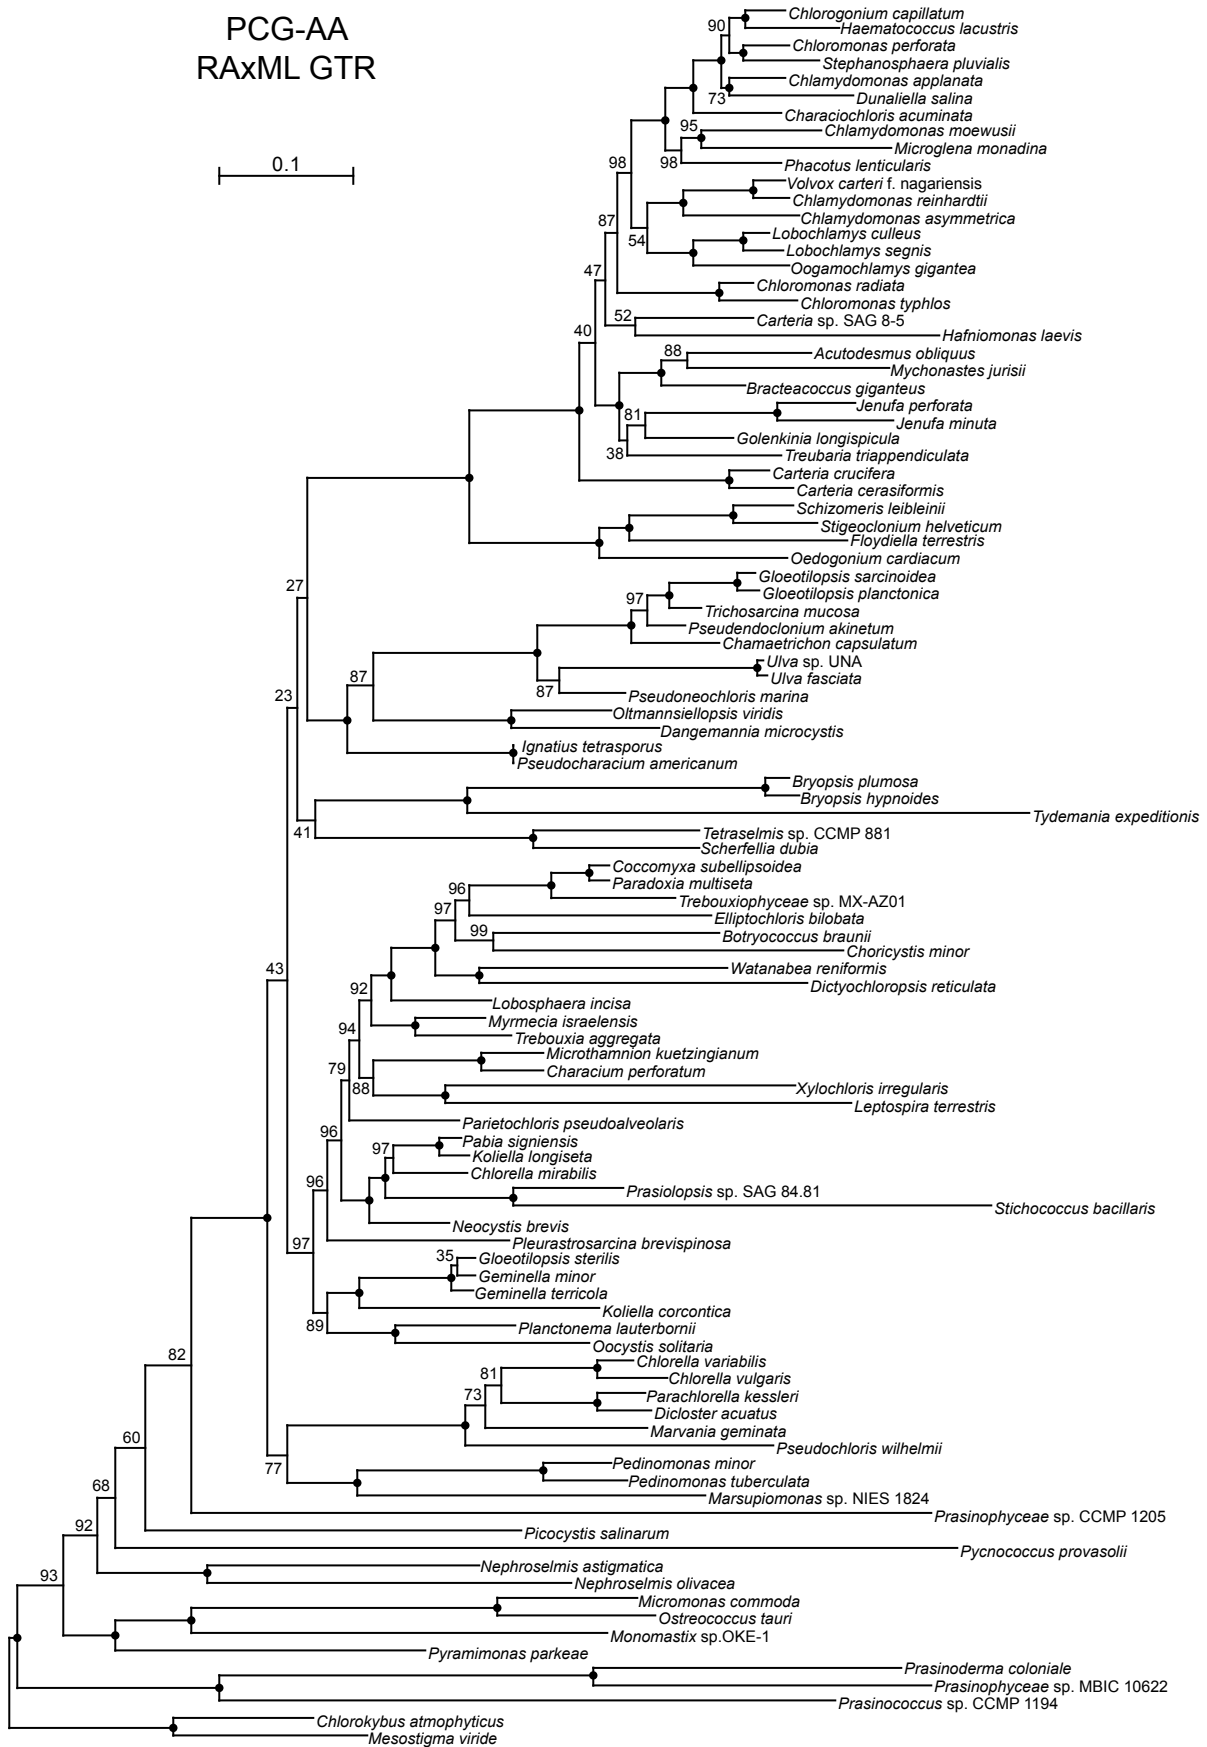

Figure S10

PCG-AA  
PhyloBayes CAT-GTR

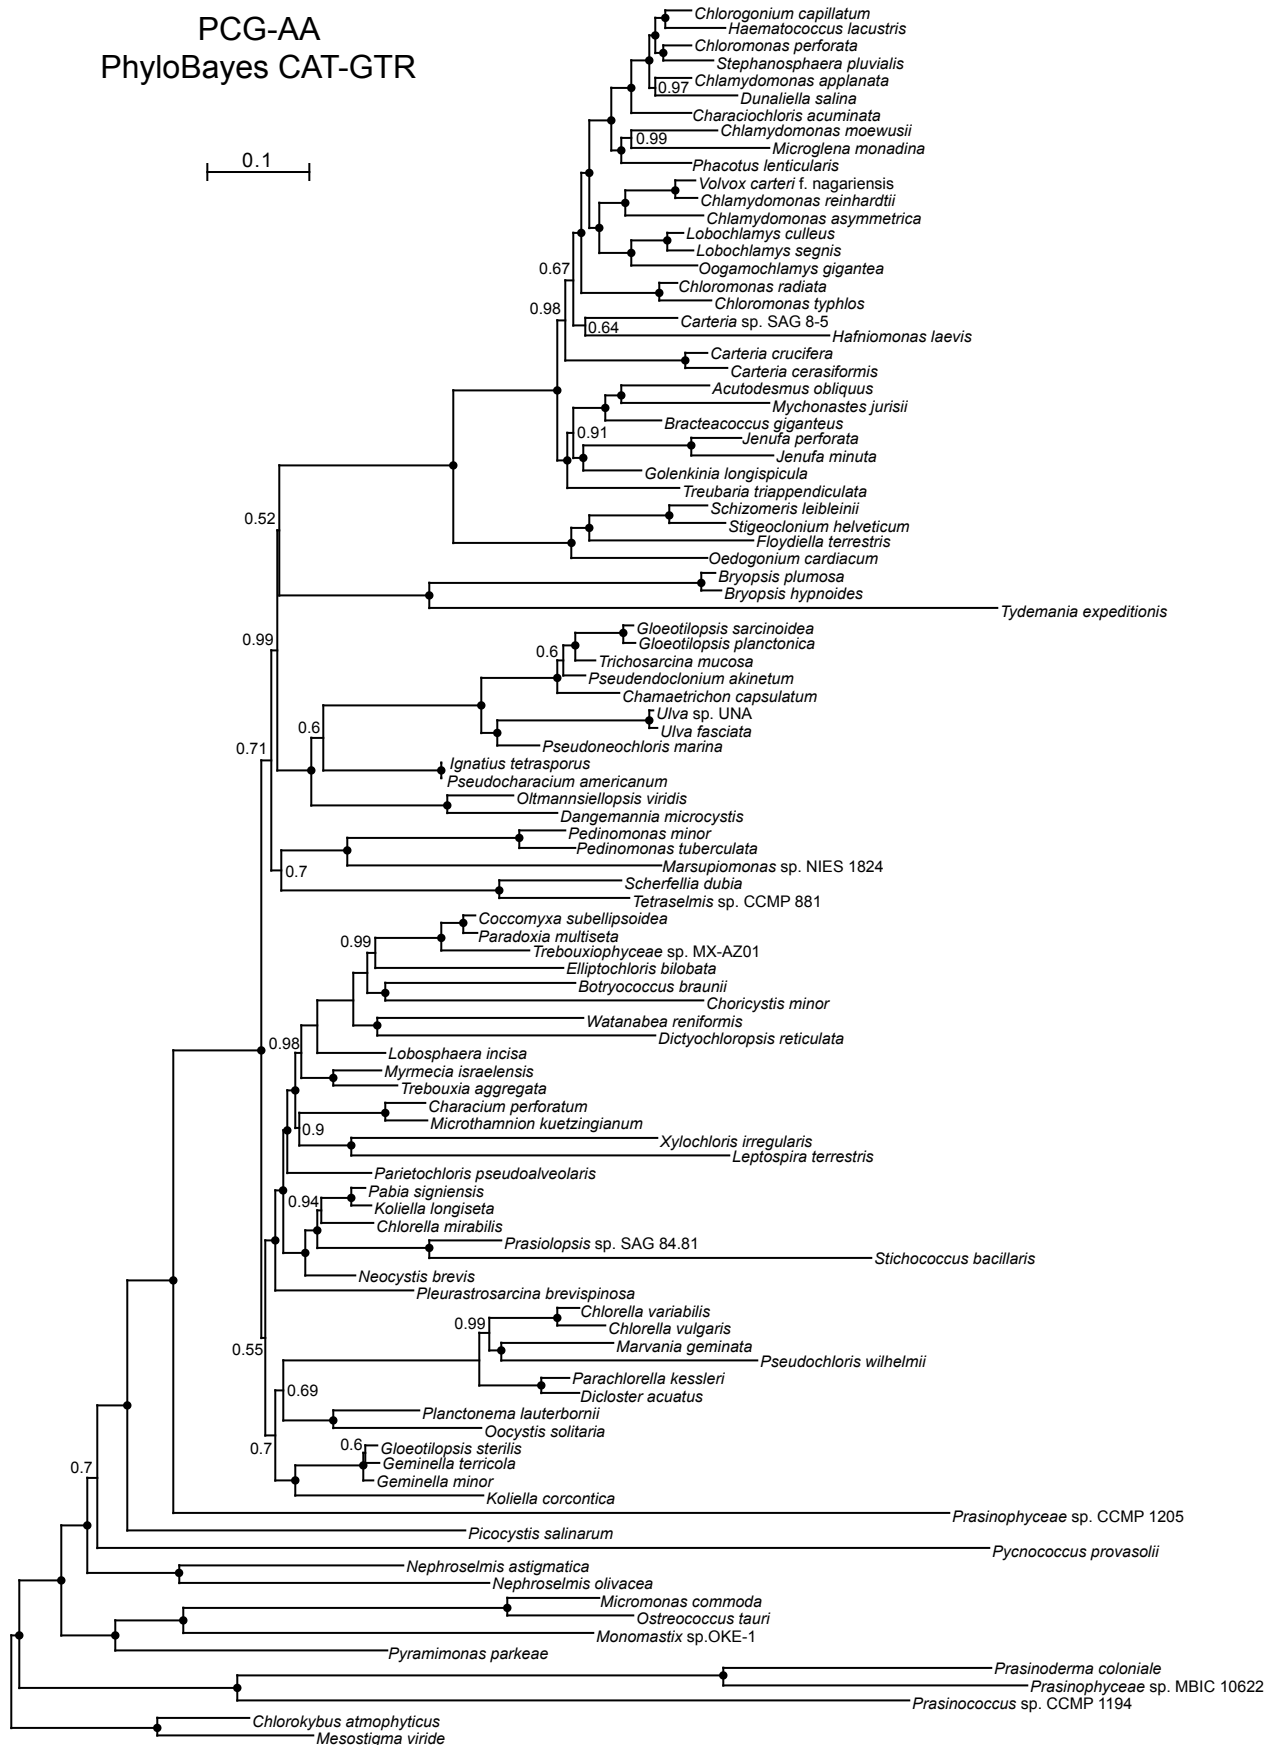

Figure S11

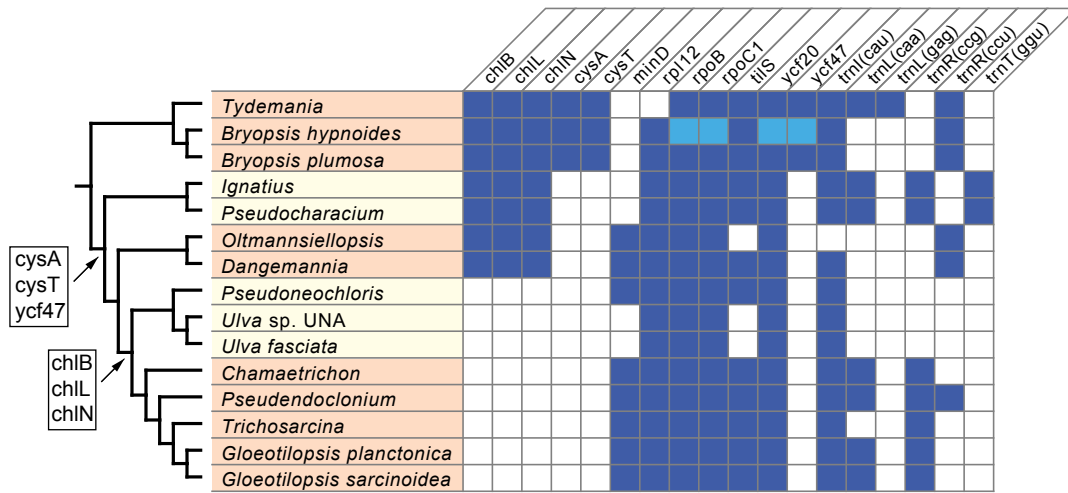

Figure S12
